# Supplementary material for: Use, applicability, and dissemination of patient versions of clinical practice guidelines in oncology in Germany: a qualitative interview study with healthcare providers
Source: Springer Nature journal article supplement (doi:10.1186/s12913-024-10626-8), 2024-03-04
Supplement: MOESM3 [file 26810986]

1 Additional file 3: Data Coding System

2 **Use, applicability and dissemination of patient versions of clinical practice guidelines in oncology in Germany - a qualitative interview study with health care**  
3 **providers**

4 M.Sc. Sarah Wahlen<sup>1</sup> (sarah.wahlen@outlook.de), Dr. Jessica Breuing<sup>1</sup> (Jessica.breuing@uni-wh.de), M.Sc. Monika Becker<sup>1</sup> (m.becker@md-bund.de), Dr. Stefanie Bühn<sup>1</sup>  
5 (stefanie.buehn@klimawandel-gesundheit.de), M.A. Julia Hauprich<sup>1</sup> (juliahauprich@web.de), Dr. Nadja Könsen<sup>1</sup> (Nadja.koensgen@uni-wh.de), M.Sc. Nora Meyer<sup>1</sup>  
6 (Nora.meyer@uni-wh.de), Dr. Susanne Blödt<sup>2</sup> (bloedt@awmf.org), Günther Carl<sup>3</sup> (guenther.carl@prostatakrebs-bps.de), Dr. Markus Follmann<sup>4</sup>  
7 (follmann@krebsgesellschaft.de), Stefanie Frenz<sup>5</sup> (s.frenz@frauenselbsthilfe.de), Dipl.-Soz. Wiss. Thomas Langer<sup>4</sup> (langer@krebsgesellschaft.de), Dr. Monika Nothacker<sup>2</sup>  
8 (nothacker@awmf.org), M.A. Corinna Schaefer<sup>6</sup> (schaefer@azq.de), Prof. Dr. Dawid Pieper<sup>1,7,8</sup> (Dawid.Pieper@mhb-fontane.de)

9  
10 <sup>1</sup> Institute for Research in Operative Medicine (IFOM), Witten/Herdecke University, Cologne, Germany

11 <sup>2</sup> Institute for Medical Knowledge Management c/o Philipps University Marburg, Association of the Scientific Medical Societies in Germany, Marburg / Berlin, Germany

12 <sup>3</sup> German Prostate Cancer Support Group, Bonn, German

13 <sup>4</sup> Office of the German Guideline Program in Oncology (GGPO), c/o German Cancer Society, Berlin, Germany

14 <sup>5</sup> Frauenhilfe Krebs Bundesverband e.V., Bonn, Germany

15 <sup>6</sup> German Agency for Quality in Medicine, Berlin, Germany

16 <sup>7</sup> Faculty of Health Sciences Brandenburg, Brandenburg Medical School (Theodor Fontane), Institute for Health Services and Health System Research, Rüdersdorf,  
17 Germany

18 <sup>8</sup> Centre for Health Services Research, Brandenburg Medical School (Theodor Fontane), Rüdersdorf, Germany

19  
20 Corresponding author: Sarah Wahlen (sarah.wahlen@outlook.de), Tel. +49 221 9895747

1 **Coding Tree**

| Content                                                       | Category                            | Subcode                          | Rule                                                                        | Category specification                                                    |                                                                                                                                                                                                                                                                                                                                            |
|---------------------------------------------------------------|-------------------------------------|----------------------------------|-----------------------------------------------------------------------------|---------------------------------------------------------------------------|--------------------------------------------------------------------------------------------------------------------------------------------------------------------------------------------------------------------------------------------------------------------------------------------------------------------------------------------|
| General information (black)                                   | assigned patient version            | /                                | One word                                                                    |                                                                           |                                                                                                                                                                                                                                                                                                                                            |
|                                                               | Clinical Indication of patient      | /                                | One word                                                                    |                                                                           |                                                                                                                                                                                                                                                                                                                                            |
|                                                               | gender                              | Female                           |                                                                             | One word                                                                  |                                                                                                                                                                                                                                                                                                                                            |
|                                                               |                                     | Male                             |                                                                             |                                                                           |                                                                                                                                                                                                                                                                                                                                            |
|                                                               | age                                 | /                                | Just numbers                                                                | In years                                                                  |                                                                                                                                                                                                                                                                                                                                            |
|                                                               | education                           | ISCED >5                         |                                                                             | One word                                                                  | OECD, E.U., UNESCO-UIS. ISCED 2011 Operational Manual Guidelines for classifying national education programmes and related qualifications. 2015<br>Autorengruppe Bildungsberichterstattung, L.-I.f.B.u.B. Bildung in Deutschland 2020 - Ein indikatorengestützter Bericht mit einer Analyse zu Bildung in einer digitalisierten Welt. 2020 |
|                                                               |                                     | ISCED 3/4                        |                                                                             |                                                                           |                                                                                                                                                                                                                                                                                                                                            |
|                                                               |                                     | ISCED <3                         |                                                                             |                                                                           |                                                                                                                                                                                                                                                                                                                                            |
|                                                               | Profession                          | Psychotherapist/Psychooncologist |                                                                             | One word                                                                  | Actual occupation, not learned profession (e.g. a psychiatrist who works as a psycho-oncologist is referred as such and not as a physician)                                                                                                                                                                                                |
|                                                               |                                     | Physiotherapist                  |                                                                             |                                                                           |                                                                                                                                                                                                                                                                                                                                            |
|                                                               |                                     | Nurse/medical assistant          |                                                                             |                                                                           |                                                                                                                                                                                                                                                                                                                                            |
|                                                               |                                     | Physician                        |                                                                             |                                                                           |                                                                                                                                                                                                                                                                                                                                            |
|                                                               |                                     | Nurse                            |                                                                             |                                                                           |                                                                                                                                                                                                                                                                                                                                            |
|                                                               | professional experience in oncology |                                  | Just numbers and unit                                                       | time in years                                                             |                                                                                                                                                                                                                                                                                                                                            |
| professional experience in oncology with specific indications |                                     | Context                          | If experience refers to chosen patient version (specific cancer indication) |                                                                           |                                                                                                                                                                                                                                                                                                                                            |
| interaction with support groups                               | No                                  |                                  | Context                                                                     | Yes: name of support group                                                |                                                                                                                                                                                                                                                                                                                                            |
|                                                               | Yes (name of the support group)     |                                  |                                                                             |                                                                           |                                                                                                                                                                                                                                                                                                                                            |
| Type of institution                                           | Private practice                    |                                  | One word                                                                    | Private practice/ clinic with certification/ clinic without certification |                                                                                                                                                                                                                                                                                                                                            |
|                                                               | clinic with certification           |                                  |                                                                             |                                                                           |                                                                                                                                                                                                                                                                                                                                            |
|                                                               | clinic without certification        |                                  |                                                                             |                                                                           |                                                                                                                                                                                                                                                                                                                                            |

|                                                |                                                               |                                                               |                                                                        |                                                                                                             |                                                                         |
|------------------------------------------------|---------------------------------------------------------------|---------------------------------------------------------------|------------------------------------------------------------------------|-------------------------------------------------------------------------------------------------------------|-------------------------------------------------------------------------|
| General questions about patient version (blue) | definition patient version                                    |                                                               | Context                                                                | Aim/Goal/definition of patient version (individual perception)                                              |                                                                         |
|                                                | expectation patient version                                   |                                                               | Context                                                                | expectation of patient version (individual perception)                                                      |                                                                         |
|                                                | experience with patient version y/n                           | If yes:<br>Which patient version was already known            |                                                                        | Context                                                                                                     |                                                                         |
|                                                |                                                               | If yes:<br>provision of patient version by clinic or practice |                                                                        |                                                                                                             | No/online [pdf]/print                                                   |
|                                                |                                                               | If yes:<br>Referral of patient version to patients            |                                                                        |                                                                                                             | Which additional/other information sources were recommended to patients |
|                                                |                                                               | If yes: Referral of other information sources to patients     |                                                                        |                                                                                                             | e.g. blue brochures                                                     |
|                                                |                                                               | If yes: patients use of patient version                       |                                                                        |                                                                                                             | Does the patient use the patient version (and how frequently)           |
|                                                | differences in patients related to the use of patient version |                                                               | Context                                                                | Differences in target groups related to the use of patient version                                          |                                                                         |
| target group                                   |                                                               | Context                                                       | Definition of target population / Who does the patient version address |                                                                                                             |                                                                         |
| General judgement (brown)                      | what did you like about the patient version                   |                                                               | Context                                                                | General perception of the patient version                                                                   |                                                                         |
|                                                | what did you not like about the patient version               |                                                               |                                                                        |                                                                                                             |                                                                         |
| Design and presentation (red)                  | design of the patient version                                 |                                                               | Context                                                                | Overall impression (e.g., Color, size, pictures)                                                            |                                                                         |
|                                                | presentation of the text                                      |                                                               |                                                                        | color, size, spacing                                                                                        |                                                                         |
|                                                | language                                                      |                                                               |                                                                        | length of phrases, addressing                                                                               |                                                                         |
|                                                | structure of the patient version                              |                                                               |                                                                        | Structure of content, topics                                                                                |                                                                         |
|                                                | images and graphic arts                                       |                                                               |                                                                        | graphic realization, pictograms                                                                             |                                                                         |
|                                                | Suggestions for improvement (design)                          |                                                               |                                                                        | Any suggestions or comments for improvement (design),<br>How can suggestions/recommendations be implemented |                                                                         |

|                      |                                                   |  |         |                                                                                                                                        |
|----------------------|---------------------------------------------------|--|---------|----------------------------------------------------------------------------------------------------------------------------------------|
|                      | recommendations - perception                      |  |         | Presentation, format                                                                                                                   |
|                      | recommendations - pros and cons                   |  |         | Pro/Con of the usage of recommendations in patient version                                                                             |
|                      | suggestions for improvement (recommendations)     |  |         | Any suggestions or comments for an improvement of the design (reccomendations),<br>How can suggestions/recommendations be implemented? |
| Comprehension (grey) | comprehensibility - own assessment                |  | Context | General understandability, readability, simplicity                                                                                     |
|                      | comprehensibility of recommendations for patients |  | Context | Understandability, readability, simplicity of the recommendations                                                                      |
|                      | Comprehensibility – patients assessment           |  |         | Perceptions/Comprehensibility of the recommendations from patient’s point of view                                                      |
| Format (green)       | presentation format - own assessment              |  | Context | General perception of the presentation format                                                                                          |
|                      | presentation format - target group                |  | Context | Which format/design is best for each target group?                                                                                     |
|                      | volume/quantity of patient version                |  | Context | What is your opinion about the scope/extent of the patient version for different target groups?                                        |
|                      | suggestions for improvement (format)              |  | Context | Pro/con implementation                                                                                                                 |
| Trustworthiness      | trustworthiness in information                    |  | Context | Are the information trustworthy                                                                                                        |
|                      | recommend patient version y/n                     |  | Context | Would interview partner recommend the patient version                                                                                  |
| Content (yellow)     | saturation of information needs                   |  | Context | Extent/amount of information                                                                                                           |
|                      | important information                             |  | Context | Are the most important information included / which are the most important information                                                 |
|                      | missing information                               |  | Context | Additional information needed?                                                                                                         |
|                      | dispensable information                           |  | Context | Which information can be shortened/cancelled                                                                                           |
|                      | Comment or suggestion for improvement (content)   |  | Context | Any comment or suggestions for improvement in content                                                                                  |
|                      | impact of patient versions in healthcare          |  | Context | Which impact did the patient version have / Which impact will the patient version have on healthcare provision                         |

|                                                             |                                                          |              |                                            |                                                                                                                                           |
|-------------------------------------------------------------|----------------------------------------------------------|--------------|--------------------------------------------|-------------------------------------------------------------------------------------------------------------------------------------------|
| Impact of patient version (orange)                          | impact of additional decision aid                        |              | Context                                    | Is additional decision aid needed? What impact may decision support have? (Pro/Con)                                                       |
|                                                             | impact of narrative                                      |              |                                            | Is additional narrative needed? What impact may narrative have? (Pro/Con)                                                                 |
|                                                             | impact compared to other information sources             |              | Context                                    | How does the patient version differ from other information sources e.g. blue brochures from the German Cancer Aid                         |
| Dissemination of patient version to the patient (turquoise) | Timing                                                   |              | Context                                    | Ideal/wrong time to hand over the patient version<br>When does/should the patient get the patient version                                 |
|                                                             | influencing factors on dissemination of patient versions | Barriers     | Context                                    | Are there any existing influencing factors which function as barriers or facilitators in the dissemination of patient versions            |
|                                                             |                                                          | facilitators |                                            |                                                                                                                                           |
| Comment or suggestions for improvement (dissemination)      |                                                          | Context      | suggestions to improve dissemination/usage |                                                                                                                                           |
| Perception of specific topics                               | Perception of psychooncology                             |              | Context                                    | Perception of the patient / Perception of psychooncologist about the patient's treatment in psychooncology (with/without patient version) |
|                                                             | Perception of palliative care                            |              | Context                                    | Perception about the description of palliative care in patient version                                                                    |

1 Only the context is coded without the corresponding question, unless the context does not allow any conclusion about the underlying question.
